# Supplementary material for: A 3D nanostructure of graphene interconnected with hollow carbon spheres for high performance lithium–sulfur batteries
Source: Royal Society of Chemistry journal article supplement (doi:10.1039/c5ta00897b), 2015-01-01
Supplement: c5ta00897b1.pdf [file c5ta00897b1.pdf]

Electronic Supplementary Material (ESI) for Journal of Materials Chemistry A  
This journal is © The Royal Society of Chemistry 2015

## Electronic Supplementary Materials

### A 3D nanostructure of graphene interconnected with hollow carbon spheres for high performance lithium-sulfur batteries

*Shuangke Liu,<sup>\*a</sup> Kai Xie,<sup>a</sup> Zhongxue Chen,<sup>a,b</sup> Yujie Li,<sup>a</sup> Xiaobin Hong,<sup>a</sup> Jing Xu,<sup>a</sup>  
Liangjun Zhou,<sup>a</sup> Junfei Yuan<sup>a</sup> and Chunman Zheng<sup>\*a</sup>*

a College of Aerospace Science and Engineering, National University of Defense Technology, Changsha, 410073, China.

b College of Chemistry and Chemical Engineering, Hunan University, Changsha, 410082, China

E-mail: liu\_sk@139.com; zhengchunman@hotmail.com

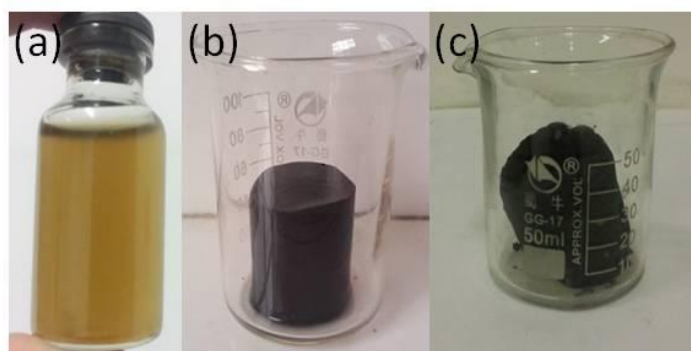

**Figure S1** optical photographs of the (a) GO solution, (b) 3D GO-RF@SiO<sub>2</sub> wet gel, and (c) rGO-RF@SiO<sub>2</sub> gel

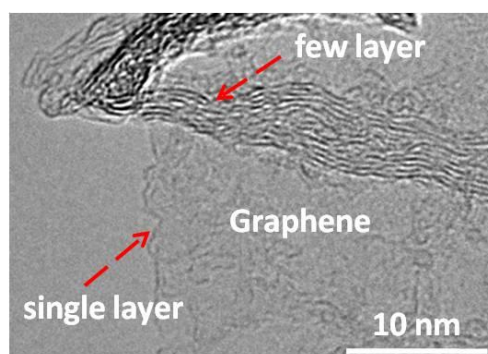

**Figure S2** selected high resolution TEM image of the 3D rGO-HCS nanocomposite.

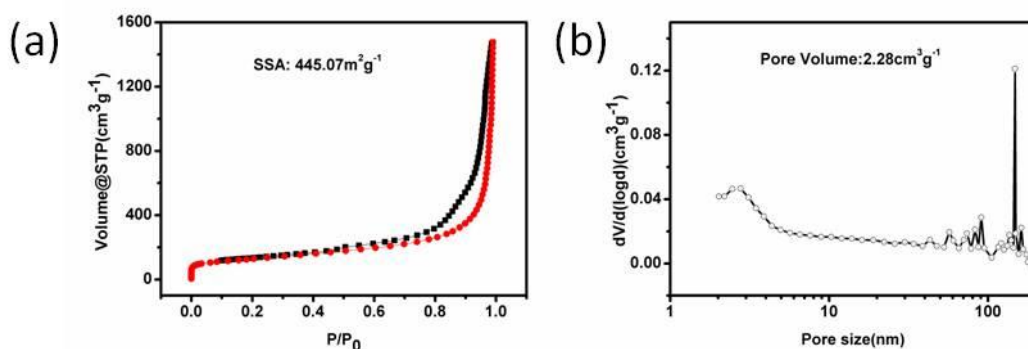

**Figure S3**  $N_2$  adsorption isotherms and pore-size distribution of 3D rGO-HCS nanocomposite.

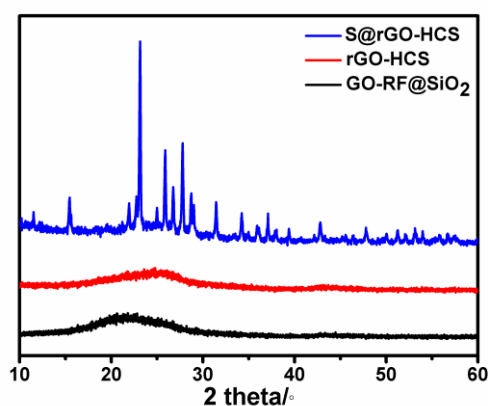

**Figure S4** XRD patterns of 3D GO-RF@SiO<sub>2</sub>, 3D rGO-HCS and the S@rGO-HCS nanocomposite

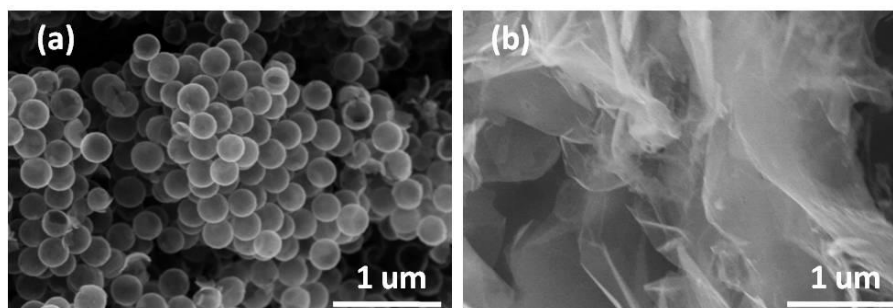

**Figure S5** SEM images of (a) S@HCS and (b) S@G nanocomposite

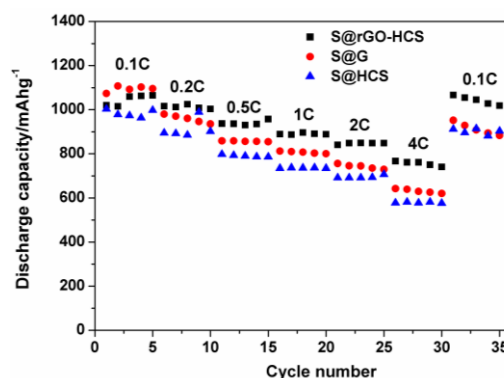

**Figure S6** Rate performance of the S@rGO-HCS, S@HCS, and S@G electrode

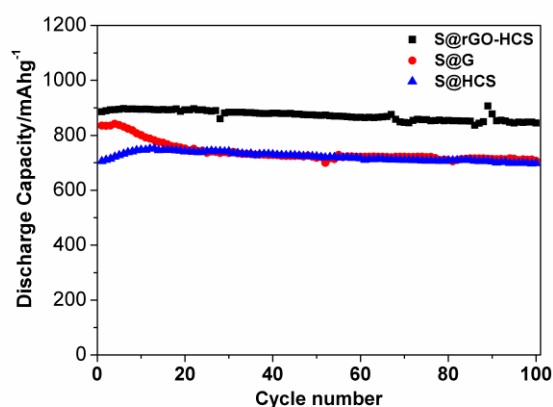

**Figure S7** Cycling performance of the S@rGO-HCS, S@HCS, and S@G electrode at 1C rate

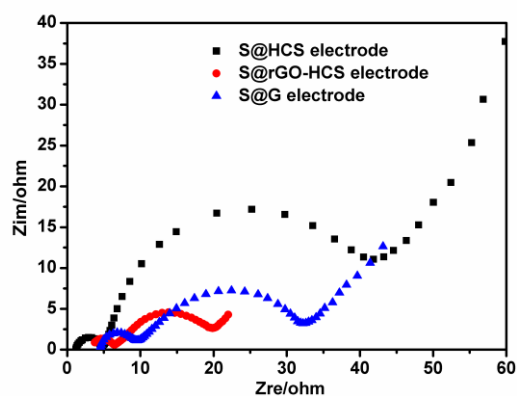

**Figure S8** Nyquist plots for the S@rGO-HCS, S@HCS and S@G electrodes in the frequency range of 100 mHz to 100 kHz

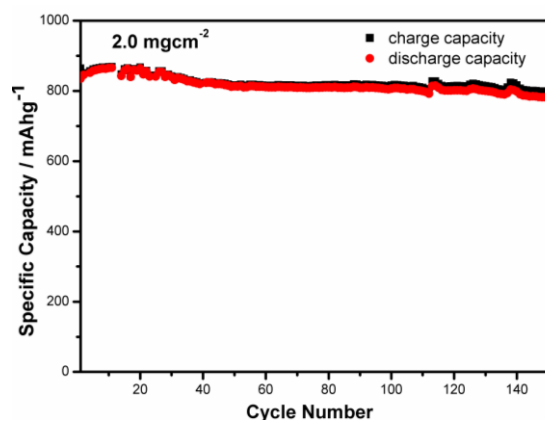

**Figure S8** Cycling performance of the S@rGO-HCS electrode with sulfur mass loading of  $2.0 \text{ mg cm}^{-2}$  at 0.5C rate

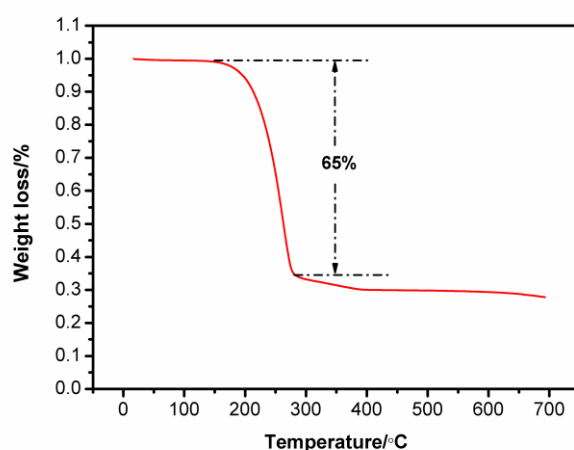

**Figure S9** Thermogravimetric analysis of the S@rGO-HCS nanocomposite, which were carried out at a flow rate of 10 °C/min under N<sub>2</sub> flow

**Table S1.** Comparisons of comprehensive performance between this work and some hollow sphere or graphene based sulfur cathode materials reported in recent years.

| Composite<br>[ref.]                  | Sulfur<br>content | Potential<br>Range<br>[V] | Discharge<br>Capacity<br>[mAhg <sup>-1</sup> ] | Cyclic<br>capacity<br>retention                          | Rate<br>parameter<br>[mAhg <sup>-1</sup> ] |
|--------------------------------------|-------------------|---------------------------|------------------------------------------------|----------------------------------------------------------|--------------------------------------------|
| C@S <sup>[46]</sup>                  | 69.7%             | 1.7~3.1                   | 1071,0.5C                                      | 91%,100th                                                | 450,3C                                     |
| p-PCNS-H <sup>[49]</sup>             | 70%               | 1.5~3.0                   | 920,0.5C                                       | 89.4%,100th                                              | 875,1C                                     |
| DHCS-S <sup>[47]</sup>               | 64%               | 1.5~3.0                   | ~1000,0.5C                                     | 69%,100th                                                | 350,1C                                     |
| HCS-S <sup>[52]</sup>                | 57%               | 1.7~2.8                   | 1098,0.12C                                     | 77%,100th                                                | —                                          |
| CarbHS-G-S <sup>[48]</sup>           | 50%               | 1.1~3.2                   | 1000,1C                                        | 60%,50th                                                 | 400,5C                                     |
| S-Pani<br>york-shell <sup>[11]</sup> | 58%               | 1.5~3.0                   | 920 ,0.5C                                      | ~77%,100th<br>68.3%,200th                                | —                                          |
| PPy⊃HCSs⊃S <sup>[51]</sup>           | 53.6%             | 1.2~3.0                   | ~600,0.5C                                      | —                                                        | ~500,1C                                    |
| PDA-NHC-S <sup>[50]</sup>            | 65%               | 1.5~2.9                   | 740,0.6C                                       | 85.1%,600th                                              | —                                          |
| GES <sup>[34]</sup>                  | 83.3%             | 1.5~3.0                   | 915,0.75C                                      | 86%,160th                                                | 480,6C                                     |
| 3D-GNS <sup>[42]</sup>               | 87.6%             | 1.7~2.8                   | 853,0.36C                                      | 92.8%,145th                                              | 743,0.9C                                   |
| N-ACNT/G@S <sub>[38]</sub>           | 52.6%             | 1.6~3.0                   | 1152,1C                                        | 76%,80th                                                 | 770,5C                                     |
| S@NG <sup>[37]</sup>                 | 65.2%             | 1.7~2.8                   | 1030,0.5C                                      | 81.5%,100 <sup>th</sup><br>73%,200th<br>69.3%,300th      | 606,5C                                     |
| L-GPCS <sup>[53]</sup>               | 68%               | 1.7~2.6                   | 885.5,0.5C                                     | 70%,100th                                                | 583,5C                                     |
| S@SCNMM <sup>[54]</sup>              | 74%               | 1.0~3.0                   | 1155,1C                                        | 75%,100th                                                | 860,5C                                     |
| S@rGO-HCS<br>(This work)             | 65%               | 1.7~2.8                   | 972,0.5C                                       | 93.9%,100th<br>86.1%,200th<br>79.3%,300th<br>73.2%,400th | ~770,4C                                    |
